# Supplementary material for: Association between glycemic variability and 28-day all-cause mortality in patients with ARDS: A retrospective study based on the MIMIC-IV database
Source: Research Square preprint supplement (doi:10.21203/rs.3.rs-5032021/v1), 2024-10-21
Supplement: Supplementary file 1 [file 3595eb6c5527b0a67c713213.docx]

| Subgroup | Tertiles by Glucv | HR (95%CI) | | |  |
| --- | --- | --- | --- | --- | --- |
| All-cause mortality | ICU mortality | Hospital mortality |  |
| Age |  |  |  |  |  |
| <60 |  |  |  |  |  |
|  | Low | ref | ref | ref |  |
|  | Moderate | 0.85(0.60,1.19) | 0.63(0.42,0.95) | 0.77(0.53,1.12) |  |
|  | High | 1.3(0.93,1.80) | 1.16(0.80,1.69) | 1.2(0.84,1.71) |  |
| ≥60 |  |  |  |  |  |
|  | Low | ref | ref | ref |  |
|  | Moderate | 0.96(0.79,1.17) | 0.95(0.74,1.23) | 0.94(0.76,1.17) |  |
|  | High | 1.16(0.96,1.40) | 1.38(1.09,1.75) | 1.19(0.96,1.47) |  |
| Sex |  |  |  |  |  |
| Male |  |  |  |  |  |
|  | Low | ref | ref | ref |  |
|  | Moderate | 0.99(0.79,1.25) | 1(0.75,1.35) | 0.94(0.73,1.22) |  |
|  | High | **1.34(1.07,1.67)** | **1.47(1.11,1.94)** | **1.3(1.02,1.67)** |  |
| Female |  |  |  |  |  |
|  | Low | ref | ref | ref |  |
|  | Moderate | 0.88(0.69,1.13) | 0.74(0.53,1.02) | 0.87(0.65,1.15) |  |
|  | High | 1.1(0.87,1.40) | 1.25(0.94,1.67) | 1.13(0.87,1.48) |  |
| Severity of ARDS | |  |  |  |  |
| Mild |  |  |  |  |  |
|  | Low | ref | ref | ref |  |
|  | Moderate | 0.99(0.81,1.21) | 0.88(0.67,1.16) | 0.91(0.73,1.15) |  |
|  | High | **1.23(1.01,1.50)** | **1.48(1.15,1.90)** | 1.25(0.998,1.55) |  |
| Moderate |  |  |  |  |  |
|  |  | ref | ref | ref |  |
|  |  | 0.96(0.67,1.36) | 0.93(0.62,1.41) | 0.96(0.66,1.41) |  |
|  |  | 1.26(0.90,1.76) | 1.34(0.91,1.97) | 1.24(0.87,1.79) |  |
| Severe |  |  |  |  |  |
|  | Low | ref | ref | ref |  |
|  | Moderate | 0.71(0.36,1.40) | 0.59(0.28, 1.25) | 0.7(0.33, 1.50) |  |
|  | High | 1.04(0.57,1.91) | 0.95(0.49, 1.84) | 0.95(0.49, 1.86) |  |
| Mean glucose  within 3 days (mg/dL) |  |  |  |  |  |
| <140 |  |  |  |  |  |
|  | Low | ref | ref | ref |  |
|  | Moderate | 0.97(0.79,1.21) | 0.89(0.67,1.18) | 0.9(0.70,1.15) |  |
|  | High | **1.38(1.11,1.72)** | **1.51(1.15,1.98)** | **1.37(1.08,1.75)** |  |
| ≥140 |  |  |  |  |  |
|  | Low | ref | ref | ref |  |
|  | Moderate | 0.83(0.63,1.08) | 0.74(0.52,1.04) | 0.82(0.60,1.10) |  |
|  | High | 0.98(0.76,1.25) | 1.06(0.78,1.43) | 0.98(0.74,1.29) |  |
| Diabetes |  |  |  |  |  |
| No |  |  |  |  |  |
|  | Low | ref | ref | ref |  |
|  | Moderate | 0.97(0.80,1.18) | 0.94(0.73,1.20) | 0.92(0.74,1.14) |  |
|  | High | **1.37(1.13,1.66)** | **1.62(1.28,2.05)** | **1.37(1.10,1.69)** |  |
| Yes |  |  |  |  |  |
|  | Low | ref | ref | ref |  |
|  | Moderate | 0.83(0.58,1.17) | 0.63(0.40,0.98) | 0.82(0.55,1.22) |  |
|  | High | 1.01(0.74,1.39) | 0.92(0.63,1.36) | 1(0.70,1.43) |  |
