# Supplementary material for: Association between glycemic variability and 28-day all-cause mortality in patients with ARDS: A retrospective study based on the MIMIC-IV database
Source: Research Square preprint supplement (doi:10.21203/rs.3.rs-5032021/v1), 2024-10-21
Supplement: Supplementary file 2 [file 81dbb570d7607d67c6e67d08.docx]

| Character | All-cause mortality | |  | ICU mortality | |  | Hospital mortality | |  |
| --- | --- | --- | --- | --- | --- | --- | --- | --- | --- |
| HR (95%CI) | P |  | HR (95%CI) | P |  | HR (95%CI) | P |  |
| Glucv | 1.006(1.002,1.010) | **0.006** |  | 1.009(1.004,1.014) | **<0.001** |  | 1.006(1.001,1.011) | **0.014** |  |
| Tertiles by Glucv |  |  |  |  |  |  |  |  |  |
| Low | ref | ref |  | ref | ref |  | ref | ref |  |
| Moderate | 0.94(0.79,1.11) | 0.434 |  | 0.86(0.69,1.07) | 0.169 |  | 0.90(0.74,1.08) | 0.257 |  |
| High | 1.21(1.03,1.43) | **0.019** |  | 1.34(1.10,1.64) | **0.004** |  | 1.21(1.01,1.45) | **0.039** |  |
