# Supplementary material for: Association between glycemic variability and 28-day all-cause mortality in patients with ARDS: A retrospective study based on the MIMIC-IV database
Source: Research Square preprint supplement (doi:10.21203/rs.3.rs-5032021/v1), 2024-10-21
Supplement: Supplementary file 3 [file 854ad0d37d394a1e99942d9e.docx]

| Independent variable | Total (N=3868) | Low  (≤13.88%, N=1288) | Moderate (13.88%-22.80%, N=1291) | High  (>22.80%, N=1289) | P |  |
| --- | --- | --- | --- | --- | --- | --- |
| Age (y) | 66.69 [55.68, 77.35] | 66.45 [54.64, 77.67] | 66.94 [56.19, 76.39] | 66.69 [56.31, 77.46] | 0.825 |  |
| Sex (%) |  |  |  |  | **0.001** |  |
| Female | 1641 (42.4) | 539 (41.8) | 505 (39.1) | 597 (46.3) |  |  |
| Male | 2227 (57.6) | 749 (58.2) | 786 (60.9) | 692 (53.7) |  |  |
| Race (%) |  |  |  |  | **0.003** |  |
| White | 2580 (66.7) | 885 (68.7) | 884 (68.5) | 811 (62.9) |  |  |
| Black | 320 (8.3) | 92 (7.1) | 106 (8.2) | 122 (9.5) |  |  |
| Asian | 82 (2.1) | 22 (1.7) | 30 (2.3) | 30 (2.3) |  |  |
| Hispanic | 106 (2.7) | 28 (2.2) | 45 (3.5) | 33 (2.6) |  |  |
| Other/Unknown | 780 (20.2) | 261 (20.3) | 226 (17.5) | 293 (22.7) |  |  |
| BMI (kg/m2) | 29.15 [25.11, 34.29] | 30.00 [25.36, 35.18] | 29.07 [25.39, 34.30] | 28.48 [24.77, 33.49] | **0.003** |  |
| ARDS severity (%) |  |  |  |  | **<0.001** |  |
| Mild | 2743 (70.9) | 1013 (78.6) | 904 (70.0) | 826 (64.1) |  |  |
| Moderate | 818 (21.1) | 211 (16.4) | 260 (20.1) | 347 (26.9) |  |  |
| Severe | 307 (7.9) | 64 (5.0) | 127 (9.8) | 116 (9.0) |  |  |
| CCI | 6.00 [4.00, 8.00] | 5.00 [4.00, 7.00] | 6.00 [4.00, 7.00] | 6.00 [4.00, 8.00] | **<0.001** |  |
| Comorbidities, n (%) |  |  |  |  |  |  |
| Cardiovascular disease (%) | 1681 (43.5) | 549 (42.6) | 526 (40.7) | 606 (47.0) | **0.004** |  |
| CAD (%) | 554 (14.3) | 147 (11.4) | 190 (14.7) | 217 (16.8) | **<0.001** |  |
| Chronic pulmonary disease (%) | 1242 (32.1) | 417 (32.4) | 412 (31.9) | 413 (32.0) | 0.967 |  |
| Diabetes (%) | 1201 (31.0) | 281 (21.8) | 378 (29.3) | 542 (42.0) | **<0.001** |  |
| Liver disease (%) | 714 (18.5) | 206 (16.0) | 232 (18.0) | 276 (21.4) | **0.002** |  |
| Malignancy (%) | 662 (17.1) | 225 (17.5) | 215 (16.7) | 222 (17.2) | 0.853 |  |
| Renal disease (%) | 809 (20.9) | 215 (16.7) | 247 (19.1) | 347 (26.9) | **<0.001** |  |
| AIDS (%) | 29 (0.7) | 9 (0.7) | 9 (0.7) | 11 (0.9) | 0.870 |  |
| Severity scoring systems, median |  |  |  |  |  |  |
| SAPSII | 41.00 [32.00, 52.00] | 37.00 [29.00, 46.00] | 40.00 [32.00, 50.00] | 47.00 [36.00, 59.00] | **<0.001** |  |
| SOFA | 7.00 [5.00, 11.00] | 6.00 [4.00, 9.00] | 7.00 [5.00, 10.00] | 9.00 [6.00, 13.00] | **<0.001** |  |
| GCS | 13.00 [8.00, 15.00] | 13.00 [9.00, 15.00] | 14.00 [8.00, 15.00] | 12.00 [6.00, 14.00] | **<0.001** |  |
| Medication |  |  |  |  |  |  |
| Insulin (%) | 755 (19.5) | 111 (8.6) | 275 (21.3) | 369 (28.6) | **<0.001** |  |
| Glucocorticoids (%) | 892 (23.1) | 220 (17.1) | 272 (21.1) | 400 (31.0) | **<0.001** |  |
| Hyperglycemia (>140mg/dl, %) | 884 (54.0) | 158 (36.3) | 299 (52.4) | 427 (67.6) | **<0.001** |  |
| Hyperglycemia |  |  |  |  | 0.149 |  |
| without diabetes | 495 (56.0) | 98 (62.0) | 170 (56.9) | 227 (53.2) |  |  |
| with diabetes | 389 (44.0) | 60 (38.0) | 129 (43.1) | 200 (46.8) |  |  |
| Mean-glucose within 3 days (mg/dL) | 133.17 [113.50, 159.57] | 123.50 [108.15, 140.29] | 130.50 [112.90, 153.58] | 150.57 [124.83, 187.25] | **<0.001** |  |
| Mean-WBC within 3 days (103/μL) | 11.73 [8.66, 15.70] | 11.22 [8.45, 14.63] | 11.99 [8.88, 15.75] | 12.25 [8.72, 16.72] | **<0.001** |  |
| Mean-NLR within 3 days | 9.51 [5.46, 17.07] | 8.77 [5.15, 15.80] | 9.03 [5.17, 16.04] | 10.66 [6.11, 19.54] | **<0.001** |  |
