# Supplementary material for: Association between glycemic variability and 28-day all-cause mortality in patients with ARDS: A retrospective study based on the MIMIC-IV database
Source: Research Square preprint supplement (doi:10.21203/rs.3.rs-5032021/v1), 2024-10-21
Supplement: Supplementary file 4 [file c6b77fba19a12f5ecb09bf8c.docx]

| Outcome | Total (N=3868) | Low  (≤13.88%, N=1288) | Moderate (13.88%-22.80%, N=1291) | High  (>22.80%, N=1289) | P |
| --- | --- | --- | --- | --- | --- |
| Mortality, n (%) |  |  |  |  |  |
| 7-day | 532 (13.8) | 137 (10.6) | 125 ( 9.7) | 270 (20.9) | **<0.001** |
| 14-day | 779 (20.1) | 203 (15.8) | 201 (15.6) | 375 (29.1) | **<0.001** |
| 21-day | 941 (24.3) | 253 (19.6) | 263 (20.4) | 425 (33.0) | **<0.001** |
| 28-day | 1026 (26.5) | 271 (21.0) | 296 (22.9) | 459 (35.6) | **<0.001** |
| ICU | 707 (18.3) | 163 (12.7) | 173 (13.4) | 371 (28.8) | **<0.001** |
| Hospital | 825 (21.3) | 215 (16.7) | 228 (17.7) | 382 (29.6) | **<0.001** |
| Length of stay, median [IQR] |  |  |  |  |  |
| Hospital, day | 8.66 [5.22, 14.99] | 8.39 [5.21, 14.18] | 8.93 [5.45, 15.70] | 8.67 [4.88, 15.26] | **0.012** |
| ICU, day | 4.14 [2.16, 8.28] | 3.91 [2.14, 7.72] | 4.07 [2.12, 7.88] | 4.68 [2.37, 9.24] | **<0.001** |
