# Supplementary material for: Association between glycemic variability and 28-day all-cause mortality in patients with ARDS: A retrospective study based on the MIMIC-IV database
Source: Research Square preprint supplement (doi:10.21203/rs.3.rs-5032021/v1), 2024-10-21
Supplement: Supplementary file 5 [file eefa9620dc219a49e90b177c.docx]

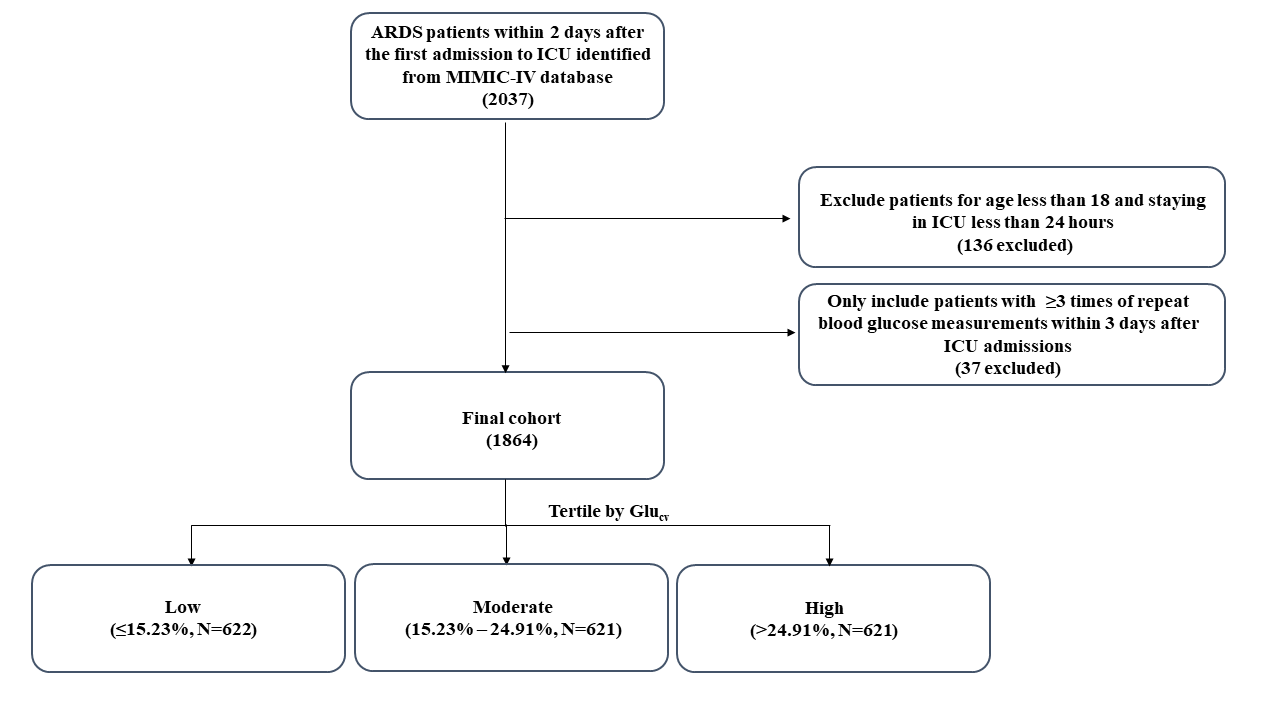
eFigure 1. Study cohort. Illustration of exclusion and inclusion criteria as utilized to select the final cohort of 3868 patients with ARDS identified by the 2012 Berlin definition.


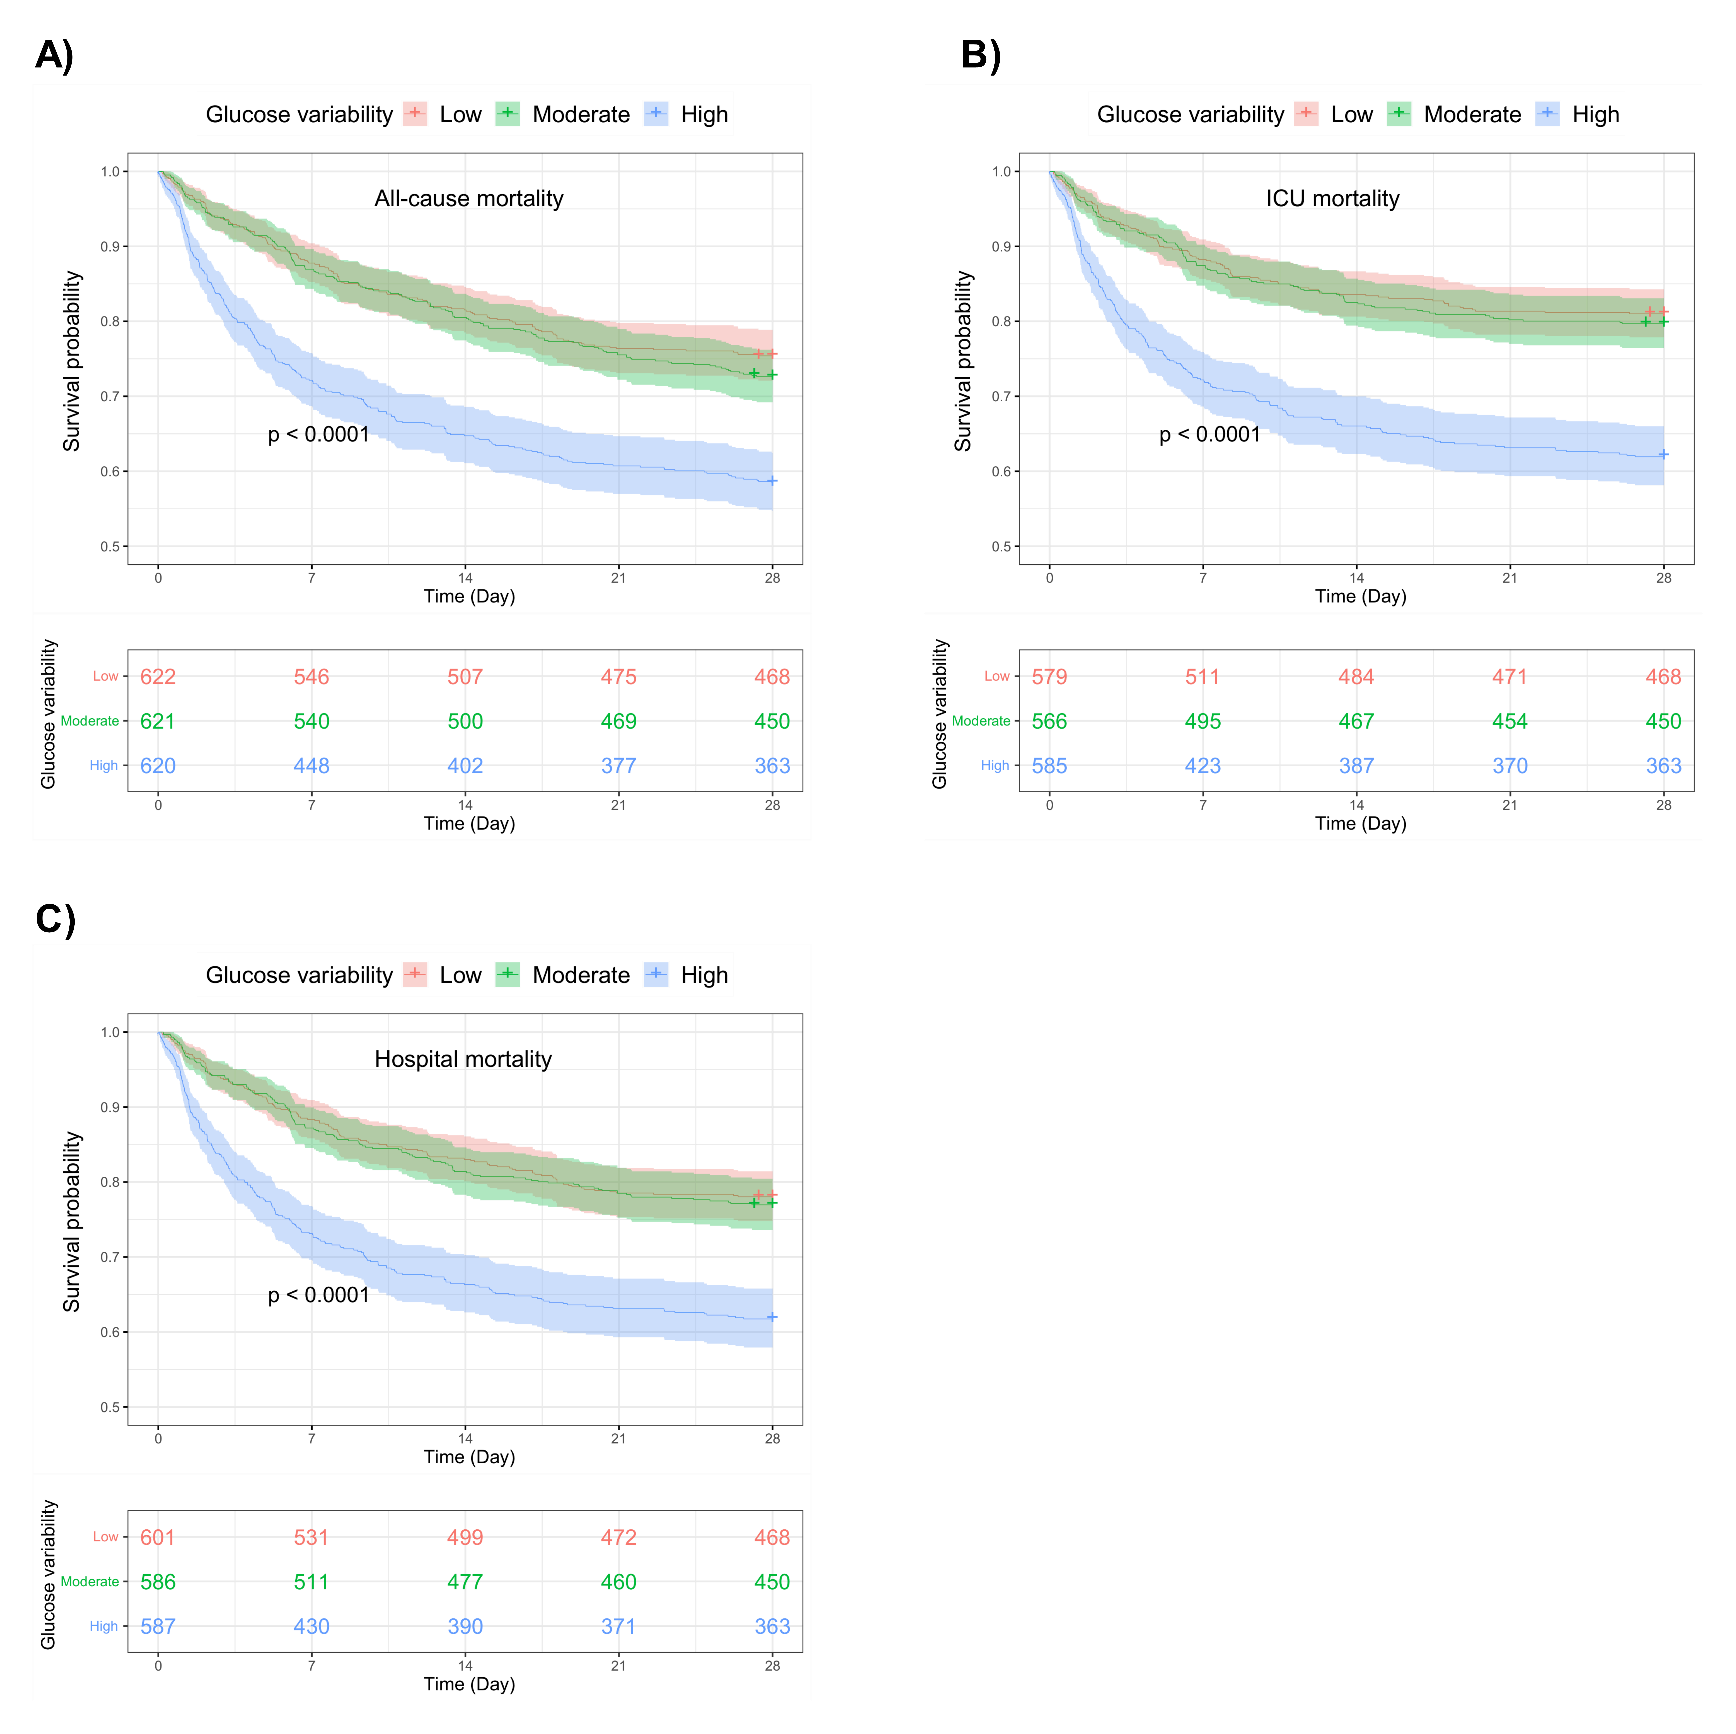
Figure 2. Kaplan-Meier analysis of the probability of survival of patients with ARDS (identified by the 2012 Berlin definition) according to the tertiles of GluCV.

Kaplan–Meier curves and cumulative incidence of (A)28-day all-cause mortality, (B) ICU mortality and (C) hospital mortality stratified by GluCV.


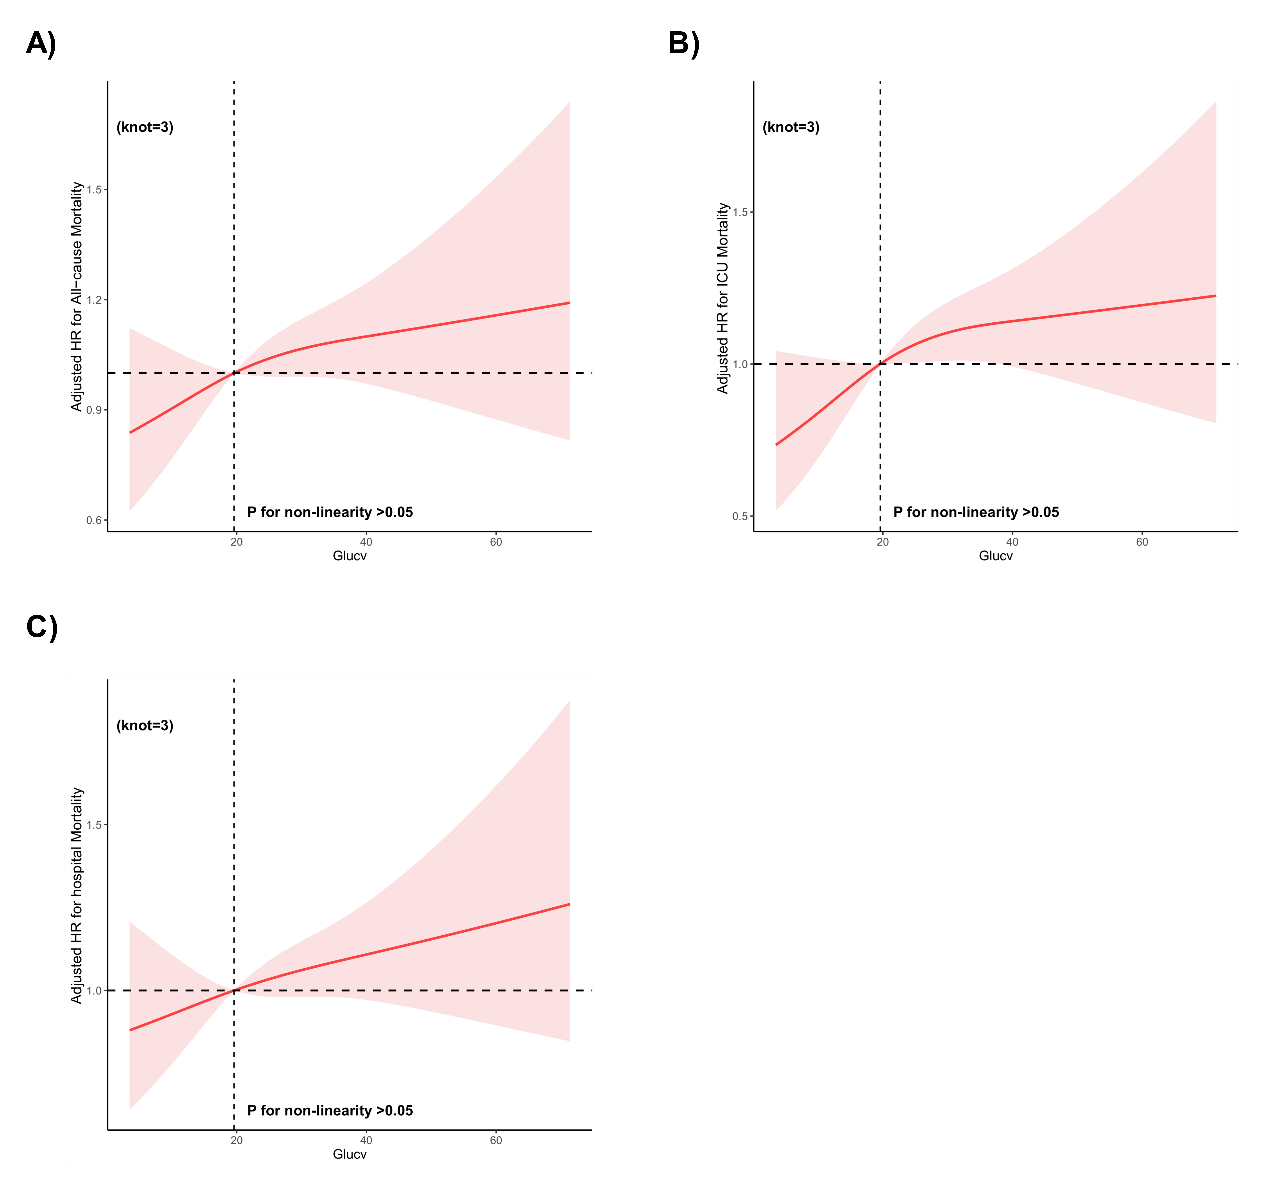
eFigure 3. Restricted cubic spline regression analysis of GluCV with 28-day all-cause mortality in patients with ARDS identified by the 2012 Berlin definition.

(A) 28-day all-cause mortality, (B) ICU mortality, (C) hospital mortality. Multivariate model was adjusted for age, sex, race, severity of ARDS, CCI, SAPS II and GCS scores and use of insulin and glucocorticoids.

eTable 1 Characteristics of patients with ARDS (identified by the 2012 Berlin definition) at the admission to ICU according to tertiles of glycemic variability within 3 days.

| Independent variable | Total (N=1864) | Low  (≤15.23%, N=622) | Moderate (15.23%-24.91%, N=621) | High  (>24.91%, N=621) | P |  |
| --- | --- | --- | --- | --- | --- | --- |
| Age (y) | 64.17 [52.46, 75.28] | 62.63 [50.60, 75.99] | 63.38 [52.60, 73.41] | 65.87 [55.57, 75.70] | **0.017** |  |
| Sex (%) |  |  |  |  | 0.286 |  |
| Female | 761 (40.8) | 240 (38.6) | 254 (40.9) | 267 (43.0) |  |  |
| Male | 1103 (59.2) | 382 (61.4) | 367 (59.1) | 354 (57.0) |  |  |
| Race (%) |  |  |  |  | **0.011** |  |
| White | 1116 (59.9) | 370 (59.5) | 399 (64.3) | 347 (55.9) |  |  |
| Black | 170 (9.1) | 48 (7.7) | 55 (8.9) | 67 (10.8) |  |  |
| Asian | 37 (2.0) | 8 (1.3) | 11 (1.8) | 18 (2.9) |  |  |
| Hispanic | 59 (3.2) | 16 (2.6) | 23 (3.7) | 20 (3.2) |  |  |
| Other/Unknown | 482 (25.9) | 180 (28.9) | 133 (21.4) | 169 (27.2) |  |  |
| BMI (kg/m2) | 29.51 [25.19, 35.04] | 30.71 [25.77, 36.94] | 29.07 [25.07, 34.41] | 29.00 [24.85, 34.03] | **0.005** |  |
| ARDS severity (%) |  |  |  |  | 0.061 |  |
| Mild | 986 (52.9) | 353 (56.8) | 325 (52.3) | 308 (49.6) |  |  |
| Moderate | 766 (41.1) | 229 (36.8) | 257 (41.4) | 280 (45.1) |  |  |
| Severe | 112 (6.0) | 40 (6.4) | 39 (6.3) | 33 (5.3) |  |  |
| CCI | 5.00 [4.00, 7.00] | 5.00 [3.00, 7.00] | 5.00 [3.00, 7.00] | 6.00 [4.00, 8.00] | **<0.001** |  |
| Comorbidities, n (%) |  |  |  |  |  |  |
| Cardiovascular disease (%) | 777 (41.7) | 240 (38.6) | 253 (40.7) | 284 (45.7) | **0.032** |  |
| CAD (%) | 268 (14.4) | 71 (11.4) | 81 (13.0) | 116 (18.7) | **0.001** |  |
| Chronic pulmonary disease (%) | 555 (29.8) | 183 (29.4) | 178 (28.7) | 194 (31.2) | 0.594 |  |
| Diabetes (%) | 582 (31.2) | 134 (21.5) | 179 (28.8) | 269 (43.3) | **<0.001** |  |
| Liver disease (%) | 403 (21.6) | 124 (19.9) | 128 (20.6) | 151 (24.3) | **0.130** |  |
| Malignancy (%) | 247 (13.3) | 75 (12.1) | 82 (13.2) | 90 (14.5) | 0.448 |  |
| Renal disease (%) | 374 (20.1) | 93 (15.0) | 118 (19.0) | 163 (26.2) | **<0.001** |  |
| AIDS (%) | 17 (0.9) | 3 (0.5) | 8 (1.3) | 6 (1.0) | 0.322 |  |
| Severity scoring systems, median |  |  |  |  |  |  |
| SAPSII | 45.00 [36.00, 57.00] | 40.50 [32.00, 50.00] | 44.00 [35.00, 55.00] | 51.00 [42.00, 64.00] | **<0.001** |  |
| SOFA | 9.00 [6.00, 13.00] | 8.00 [5.00, 11.00] | 9.00 [6.00, 12.00] | 11.00 [8.00, 14.00] | **<0.001** |  |
| GCS | 11.00 [6.00, 14.00] | 11.00 [8.00, 14.00] | 11.00 [6.00, 14.00] | 10.00 [4.00, 14.00] | **0.022** |  |
| Medication |  |  |  |  |  |  |
| Insulin (%) | 353 (18.9) | 50 (8.0) | 107 (17.2) | 196 (31.6) | **<0.001** |  |
| Glucocorticoids (%) | 461 (24.7) | 110 (17.7) | 141 (22.7) | 210 (33.8) | **<0.001** |  |
| Hyperglycemia (>140mg/dl, %) | 495 (55.1) | 105 (39.6) | 151 (51.7) | 239 (69.9) | **<0.001** |  |
| Hyperglycemia |  |  |  |  | 0.182 |  |
| without diabetes | 288 (58.2) | 68 (64.8) | 90 (59.6) | 130 (54.4) |  |  |
| with diabetes | 207 (41.8) | 37 (35.2) | 61 (40.4) | 109 (45.6) |  |  |
| Mean-glucose within 3 days (mg/dL) | 135.00 [113.77, 164.82] | 123.73 [109.05, 144.53] | 132.60 [112.17, 156.89] | 157.23 [127.25, 197.71] | **<0.001** |  |
| Mean-WBC within 3 days (103/μL) | 12.14 [8.78, 16.30] | 11.69 [8.76, 15.47] | 11.95 [8.70, 16.04] | 12.73 [8.82, 17.89] | **0.011** |  |
| Mean-NLR within 3 days | 10.12 [5.67, 17.87] | 9.74 [5.50, 16.60] | 9.43 [5.58, 18.03] | 11.04 [6.29, 19.52] | 0.132 |  |

Abbreviations: AIDS, acquired immune deficiency syndrome; ARDS, acute respiratory distress syndrome; CAD, coronary artery disease; CCI, charlson comorbidity index; GCS, glasgow coma scale; GluCV, glycemic coefficient of variation; NLR, Neutrophil-to-Lymphocyte Ratio; SOFA, sequential organ failure assessment; SAPSII, simplified acute physiology score II; WBC, white blood cell. Bold text indicates P<0.05.

eTable 2 Outcomes of patients with ARDS (identified by the 2012 Berlin definition) according to tertiles of glycemic variability within 3 days.

| Outcome | Total (N=1864) | Low  (≤15.23%, N=622) | Moderate (15.23%-24.91%, N=621) | High  (>24.91%, N=621) | P |  |
| --- | --- | --- | --- | --- | --- | --- |
| Mortality, n (%) |  |  |  |  |  |  |
| 7-day | 319 (17.1) | 74 (11.9) | 78 (12.6) | 167 (26.9) | **<0.001** |  |
| 14-day | 449 (24.1) | 114 (18.3) | 118 (19.0) | 217 (34.9) | **<0.001** |  |
| 21-day | 538 (28.9) | 145 (23.3) | 150 (24.2) | 243 (39.1) | **<0.001** |  |
| 28-day | 581 (31.2) | 153 (24.6) | 170 (27.4) | 258 (41.5) | **<0.001** |  |
| ICU | 448 (24.0) | 110 (17.7) | 115 (18.5) | 223 (35.9) | **<0.001** |  |
| Hospital | 492 (26.4) | 132 (21.2) | 135 (21.7) | 225 (36.2) | **<0.001** |  |
| Length of stay, median [IQR] |  |  |  |  |  |  |
| Hospital, day | 5.50 [2.95, 10.50] | 5.44 [3.02, 10.15] | 5.79 [2.90, 10.92] | 5.34 [2.96, 10.48] | 0.929 |  |
| ICU, day | 9.91 [5.75, 17.57] | 9.89 [6.43, 17.26] | 10.22 [6.00, 18.78] | 9.55 [4.70, 16.78] | **0.003** |  |

eTable 3. Cox proportional hazard models exploring the association between tertiles of glycemic variability within 3 days and 28-day mortality among ARDS patients identified by the 2012 Berlin definition.

| Character | All-cause mortality | |  | ICU mortality | |  | Hospital mortality | |  |
| --- | --- | --- | --- | --- | --- | --- | --- | --- | --- |
| HR (95%CI) | P |  | HR (95%CI) | P |  | HR (95%CI) | P |  |
| Glucv | 1.005(0.999,1.011) | 0.112 |  | 1.006(0.9999,1.013) | 0.054 |  | 1.005(0.999,1.011) | 0.121 |  |
| Tertiles by Glucv |  |  |  |  |  |  |  |  |  |
| Low | ref | ref |  | ref | ref |  | ref | ref |  |
| Moderate | 0.95(0.76,1.19) | 0.683 |  | 0.89(0.68,1.16) | 0.378 |  | 0.89(0.70,1.14) | 0.348 |  |
| High | 1.27(1.02,1.59) | **0.032** |  | 1.36(1.05,1.75) | **0.019** |  | 1.28(1.01,1.62) | **0.044** |  |

Multivariate model was adjusted for age, sex, race, severity of ARDS, CCI, SAPS II and GCS scores and use of insulin and glucocorticoids. Abbreviations: ARDS, acute respiratory distress syndrome; CCI, charlson comorbidity index; GCS, glasgow coma scale; Glucv, glycemic coefficient of variation; SAPS II, simplified acute physiology score II. Bold text indicates P<0.05.

eTable 4. Subgroup analyses of tertiles of GluCV and 28-day mortality according to clinical characteristics among ARDS patients identified by the 2012 Berlin definition.

| Subgroup | Tertiles by GluCV | HR (95%CI) | | |  |
| --- | --- | --- | --- | --- | --- |
| All-cause mortality | ICU mortality | Hospital mortality |  |
| Age |  |  |  |  |  |
| <60 |  |  |  |  |  |
|  | Low | ref | ref | ref |  |
|  | Moderate | 0.87(0.57, 1.32) | 0.67(0.41, 1.09) | 0.76(0.48, 1.20) |  |
|  | High | 1.58(1.05, 2.38) | 1.46(0.94, 2.29) | 1.47(0.95, 2.27) |  |
| ≥60 |  |  |  |  |  |
|  | Low | ref | ref | ref |  |
|  | Moderate | 0.96(0.74,1.26) | 0.97(0.70,1.34) | 0.91(0.68,1.22) |  |
|  | High | 1.11(0.85,1.44) | 1.24(0.91,1.69) | 1.15(0.86,1.52) |  |
| Sex |  |  |  |  |  |
| Male |  |  |  |  |  |
|  | Low | ref | ref | ref |  |
|  | Moderate | 0.94(0.70,1.28) | 0.93(0.64,1.35) | 0.84(0.60,1.18) |  |
|  | High | **1.39(1.04,1.87)** | **1.58(1.13,2.23)** | **1.43(1.05,1.96)** |  |
| Female |  |  |  |  |  |
|  | Low | ref | ref | ref |  |
|  | Moderate | 0.98(0.70,1.37) | 0.83(0.56,1.23) | 0.94(0.65,1.34) |  |
|  | High | 1.15(0.82,1.62) | 1.12(0.77,1.65) | 1.11(0.77,1.61) |  |
| Severity of ARDS | |  |  |  |  |
| Mild |  |  |  |  |  |
|  | Low | ref | ref | ref |  |
|  | Moderate | 1.1(0.79,1.53) | 0.97(0.64,1.48) | 0.95(0.66,1.38) |  |
|  | High | **1.62(1.17,2.24)** | **1.92(1.31,2.81)** | **1.66(1.17,2.34)** |  |
| Moderate |  |  |  |  |  |
|  |  | ref | ref | ref |  |
|  |  | 0.86(0.61,1.20) | 0.85(0.58,1.25) | 0.85(0.59,1.22) |  |
|  |  | 1.12(0.81,1.55) | 1.17(0.81,1.71) | 1.12(0.79,1.60) |  |
| Severe |  |  |  |  |  |
|  | Low | ref | ref | ref |  |
|  | Moderate | 1.45(0.67, 3.16) | 1.23(0.50, 3.05) | 1.28(0.53, 3.08) |  |
|  | High | 0.89(0.41, 1.92) | 0.73(0.31, 1.70) | 0.83(0.36, 1.93) |  |
| Mean glucose  within 3 days (mg/dL) |  |  |  |  |  |
| <140 |  |  |  |  |  |
|  | Low | ref | ref | ref |  |
|  | Moderate | 0.93(0.70,1.26) | 0.85(0.59,1.22) | 0.84(0.60,1.17) |  |
|  | High | **1.40(1.03,1.90)** | **1.45(1.002,2.08)** | **1.40(1.004,1.96)** |  |
| ≥140 |  |  |  |  |  |
|  | Low | ref | ref | ref |  |
|  | Moderate | 1(0.70,1.42) | 0.87(0.58,1.30) | 0.92(0.63,1.34) |  |
|  | High | 1.16(0.83,1.61) | 1.14(0.79,1.63) | 1.11(0.78,1.58) |  |
| Diabetes |  |  |  |  |  |
| No |  |  |  |  |  |
|  | Low | ref | ref | ref |  |
|  | Moderate | 0.95(0.74,1.22) | 0.9(0.67,1.22) | 0.86(0.66,1.14) |  |
|  | High | **1.40(1.09,1.81)** | **1.56(1.16,2.08)** | **1.43(1.09,1.88)** |  |
| Yes |  |  |  |  |  |
|  | Low | ref | ref | ref |  |
|  | Moderate | 1.07(0.65,1.77) | 0.87(0.48,1.58) | 1.02(0.59,1.77) |  |
|  | High | 1.23(0.77,1.96) | 1.12(0.66,1.91) | 1.17(0.71,1.93) |  |
